# Supplementary material for: A highly sensitive fluorescent immunosensor for sensitive detection of nuclear matrix protein 22 as biomarker for early stage diagnosis of bladder cancer
Source: Royal Society of Chemistry journal article supplement (doi:10.1039/d0ra06191c), 2020-01-01
Supplement: d0ra06191c1.pdf [file d0ra06191c1.pdf]

## Supplementary

### Figure legend

**Fig. S1.** (a) FTIR of pure TGA, CdTe QD<sub>(D)</sub> and CdTe/CdS QD<sub>(A)</sub>, (b) FT-IR spectra of CdTe QD<sub>(D)</sub>, QD<sub>(D)</sub>\* conjugated with mAb and CdTe/CdS QD<sub>(A)</sub>, QD<sub>(A)</sub>\* conjugated with pAb

**Fig. S2-** Dependence of  $(ahn)^2$  of CdTe core and CdTe/CdS coreshell thin films upon the incident photon energy ( $h\nu$ ).

**Fig. S3.** (a) Absorption spectra and fluorescence of QD(D) alone and QD(D)-mAb, QD(A) alone with QD(A)-pab. (b) Fluorescence spectra of QD<sub>(D)</sub> and (b) QD<sub>(D)</sub>-mAb, QD<sub>(A)</sub> and QD<sub>(A)</sub>-pAb.

1 **Fig. S4.** DLS measurement of (a), QD(D) alone (b)QD(D)-mAb, (c)QD(A) alone and (d) QD(A)-pab

**Fig. S5-** Stability of the FRET based method for detection of NMP22.

**Fig. S6-** Study the effect of interferences on FRET based method for detection NMP22.

### Table legend

**Table S1-** The comparison with other methods for NMP 22.

**Table S2-** determination of NMP 22 in urine real samples.

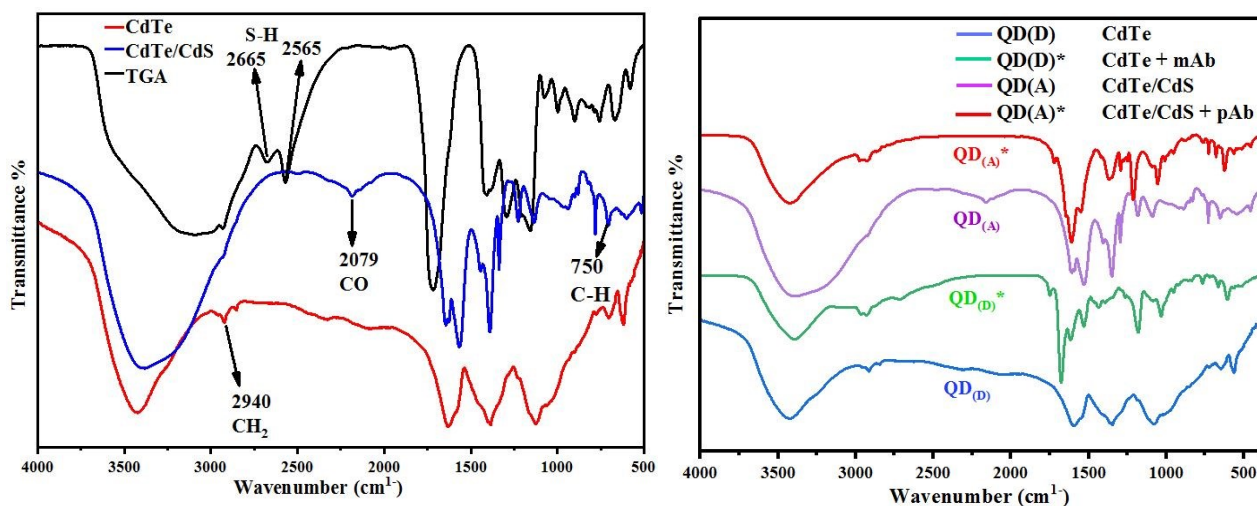

**Fig. S1.** (a) FTIR of pure TGA, CdTe QD<sub>(D)</sub> and CdTe/CdS QD<sub>(A)</sub>, (b) FT-IR spectra of CdTe QD<sub>(D)</sub>, QD<sub>(D)</sub>\* conjugated with mAb and CdTe/CdS QD<sub>(A)</sub>, QD<sub>(A)</sub>\* conjugated with pAb

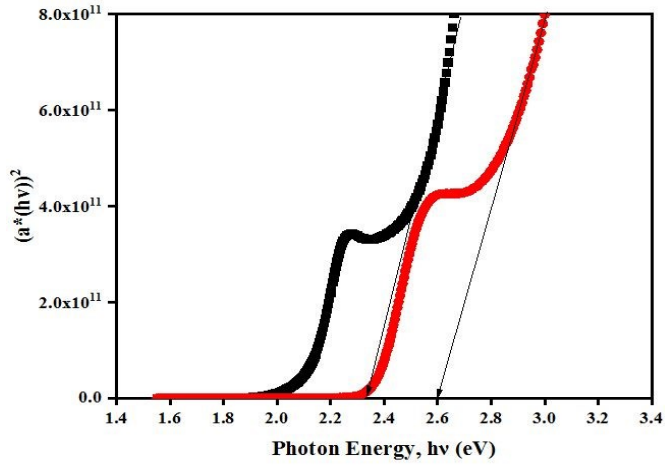

1 Fig. S2. Dependence of  $(ahn)^2$  of CdTe core and CdTe/CdS coreshell thin films upon the incident photon energy ( $h\nu$ )

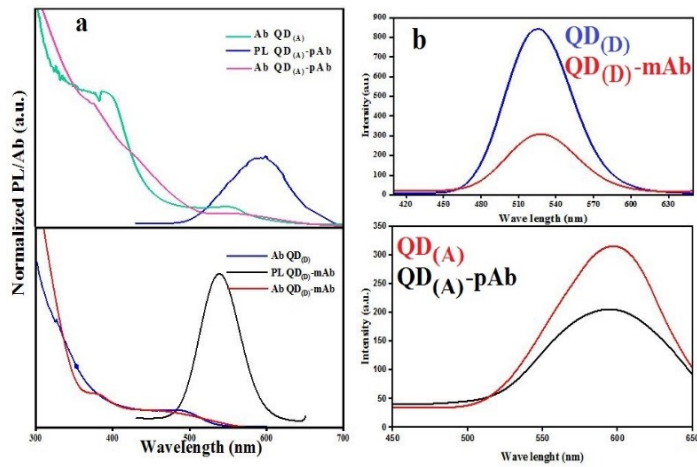

Fig. S3. (a) Absorption spectra and fluorescence of QD(D) alone and QD(D)-mAb, QD(A) alone with QD(A)-pAb. (b) Fluorescence spectra of QD(D) and (b) QD(D)-mAb, QD(A) and QD(A)-pAb

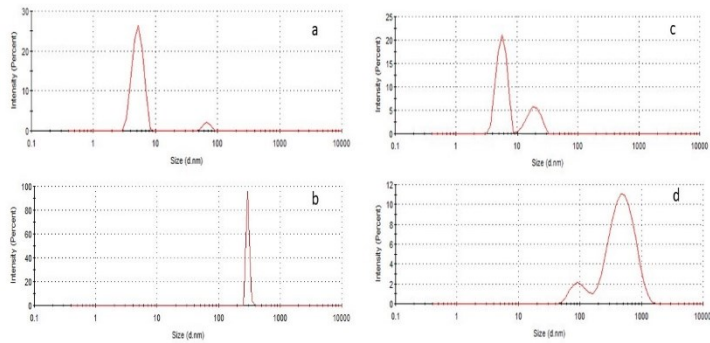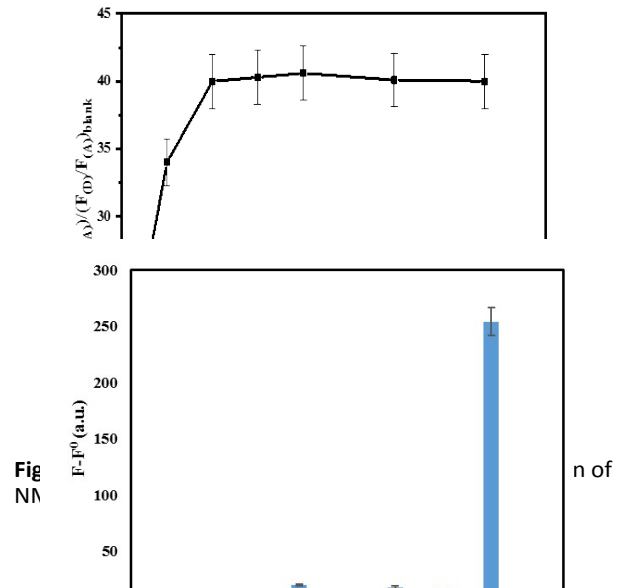

Fig. S6. Study the effect of interferences on FRET based method for detection NMP22

**Table S1.** The comparison with other methods for NMP 22

| Detection technique                  | Materials used                                                               | Linear range                  | LOD $\text{pg.mL}^{-1}$ | References    |
|--------------------------------------|------------------------------------------------------------------------------|-------------------------------|-------------------------|---------------|
| Sandwich electrochemical immunoassay |                                                                              | (1.2–200) $\text{ng.mL}^{-1}$ | 500                     | <sup>31</sup> |
| Alere NMP22 Test reagent kits        | HRP-Ab-NMP 22/Fe <sub>3</sub> O <sub>4</sub> /Au/CoPc CME                    | (4–232) $\text{ng.mL}^{-1}$   | -                       | <sup>32</sup> |
| ECL immunoassay                      | -                                                                            | (0.05–2) $\text{ng.mL}^{-1}$  | 10                      | <sup>1</sup>  |
| FRET immunosensor                    | g-C <sub>3</sub> N <sub>4</sub> @Au-Ab-NMP22<br>QD <sub>(D)</sub> -mAb-NMP22 | (2–22) $\text{pg.mL}^{-1}$    | 0.05                    | This work     |

**Table S2.** determination of NMP 22 in urine real samples

| # | FRET method ( $\text{pg.mL}^{-1}$ ) | Standard method ( $\text{pg.mL}^{-1}$ ) | Recovery% | RSD%<br>n=5 |
|---|-------------------------------------|-----------------------------------------|-----------|-------------|
| 1 | 18.87                               | 18                                      | 104.84    | 2.35        |
| 2 | 12.01                               | 12                                      | 100.07    | 1.85        |
| 3 | 6.30                                | 6                                       | 105.00    | 3.00        |
| 4 | 3.03                                | 3                                       | 101.00    | 2.56        |
